# Supplementary material for: Novel anilino quinazoline-based EGFR tyrosine kinase inhibitors for treatment of non-small cell lung cancer
Source: Royal Society of Chemistry journal article supplement (doi:10.1039/d0bm00293c), 2020-03-26
Supplement: d0bm00293c3.pdf [file d0bm00293c3.pdf]

## Supporting Information

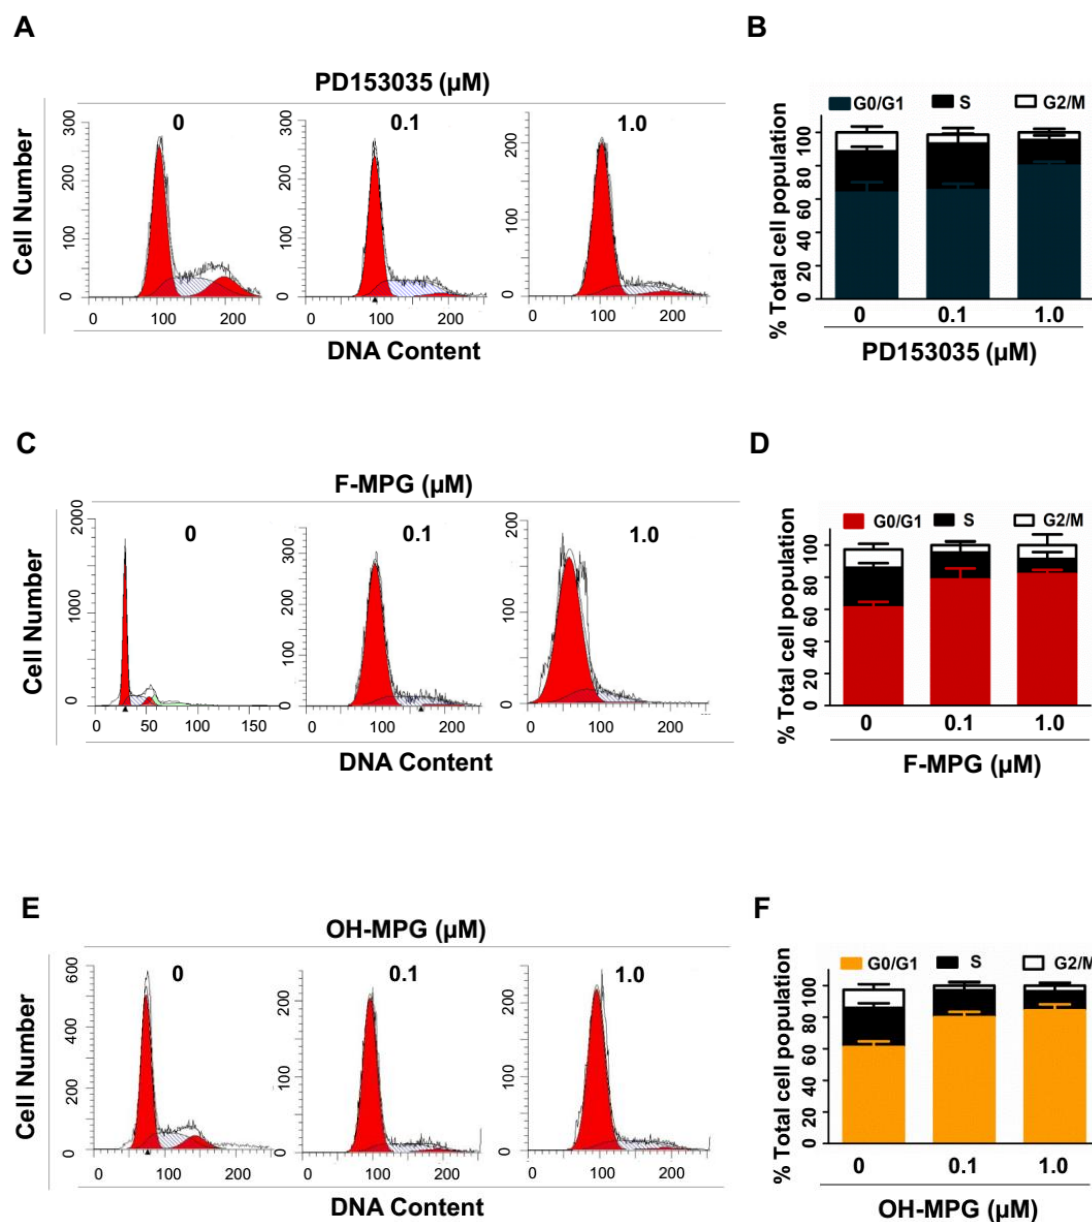

**Fig. S1 F-MPG or OH-MPG causes G<sub>0</sub>/G<sub>1</sub> phase arrest in HCC827 cells.** Induction of G<sub>0</sub>/G<sub>1</sub> phase arrest by F-MPG or OH-MPG. The representative results of HCC827 cells were treated with increasing concentrations of PD153035 (A), F-MPG (C) or OH-MPG (E) for 24h were shown. The DNA content was measured by FACS analysis. The percentage of HCC827 cells treated with PD153035 (B), F-MPG (D) and OH-MPG (F) in different cell cycle phases determined by FACS and analyzed with Graphpad Prism. The data shown are the mean  $\pm$  SD from three independent experiments, and representative images are shown.
