# Supplementary figures and images for: Novel anilino quinazoline-based EGFR tyrosine kinase inhibitors for treatment of non-small cell lung cancer
Source: Royal Society of Chemistry journal article supplement (doi:10.1039/d0bm00293c), 2020-03-26

**A**

PD153035 ( $\mu\text{M}$ )

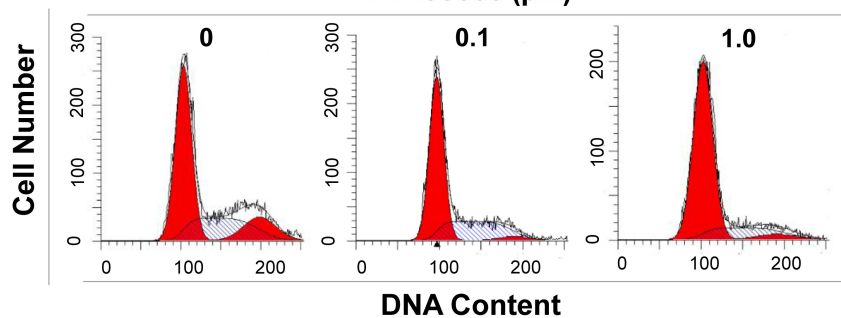

**B**

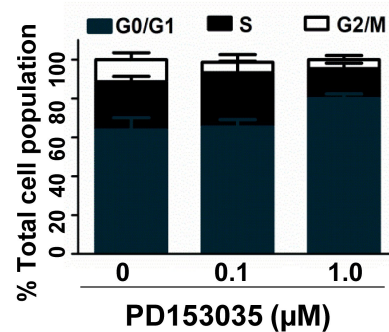

**C**

F-MPG ( $\mu\text{M}$ )

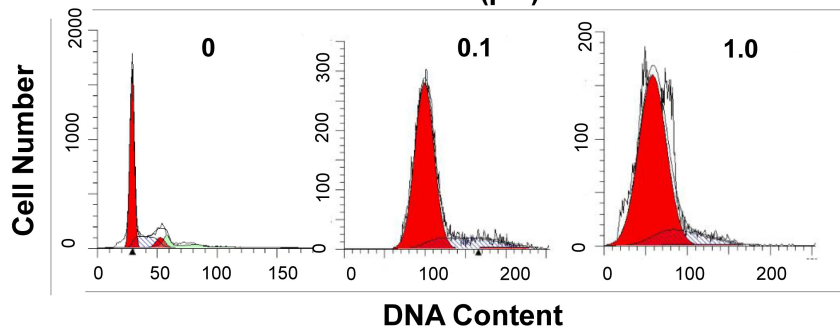

**D**

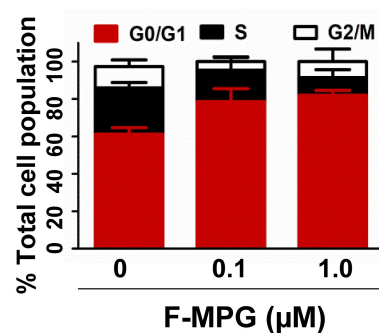

**E**

OH-MPG ( $\mu\text{M}$ )

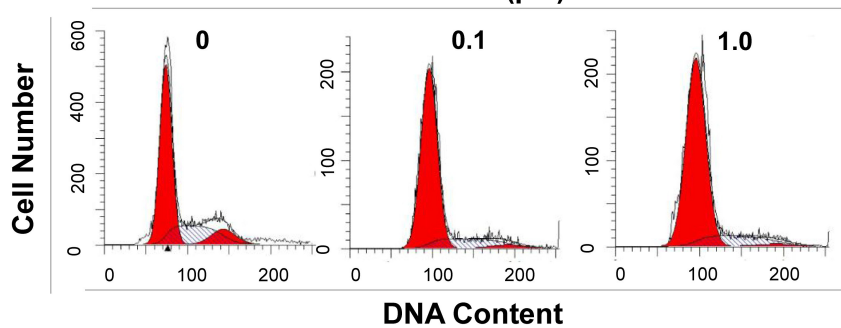

**F**

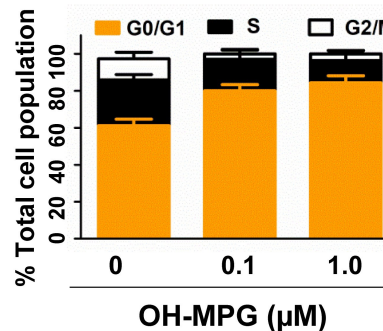

Supplement: d0bm00293c2.pdf [file d0bm00293c2.pdf]
